# Supplementary material for: Solvent-thermal preparation of a CuCo2O4/RGO heterocomposite: an efficient catalyst for the reduction of p-nitrophenol
Source: Royal Society of Chemistry journal article supplement (doi:10.1039/c6nj00374e), 2016-01-01
Supplement: c6nj00374e1.pdf [file c6nj00374e1.pdf]

Electronic supplementary information

**Solvent-thermal preparation of  $\text{CuCo}_2\text{O}_4/\text{RGO}$  heterocomposite: An  
efficient catalyst for the reduction of *p*-nitrophenol**

Weiming Zhang, Zhengwei Zhou, Xueying Shan, Ran Xu, Qun Chen, Guangyu He,  
Xiaoqiang Sun and Haiqun Chen

Key Laboratory of Advanced Catalytic Materials and Technology, Advanced  
Catalysis and Green Manufacturing Collaborative Innovation center, Changzhou  
University, Jiangsu Province, Changzhou 213164, China.

-----  
\* Corresponding author's address:

Tel: +86 519 86330088;

E-mail: hqchenyf@hotmail.com(Haiqun Chen);

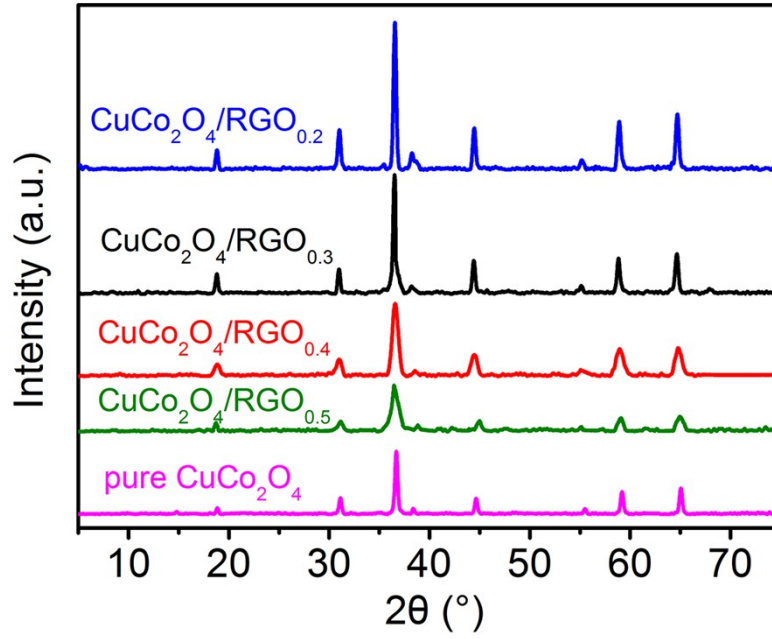

Fig. S1 XRD patterns of different content graphene

Tab. S1 The particle sizes of the different samples

| Sample                                     | The particles sizes(nm) |
|--------------------------------------------|-------------------------|
| Pure $\text{CuCo}_2\text{O}_4$             | 47.9                    |
| $\text{CuCo}_2\text{O}_4/\text{RGO}_{0.2}$ | 27.1                    |
| $\text{CuCo}_2\text{O}_4/\text{RGO}_{0.3}$ | 20.3                    |
| $\text{CuCo}_2\text{O}_4/\text{RGO}_{0.4}$ | 18.3                    |
| $\text{CuCo}_2\text{O}_4/\text{RGO}_{0.5}$ | 14.6                    |

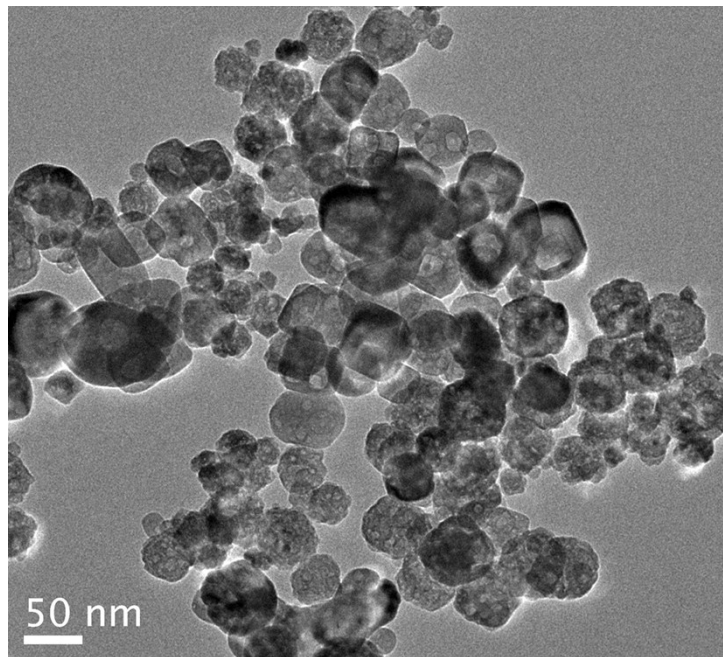

Figure S2. TEM images of pure  $\text{CuCo}_2\text{O}_4$

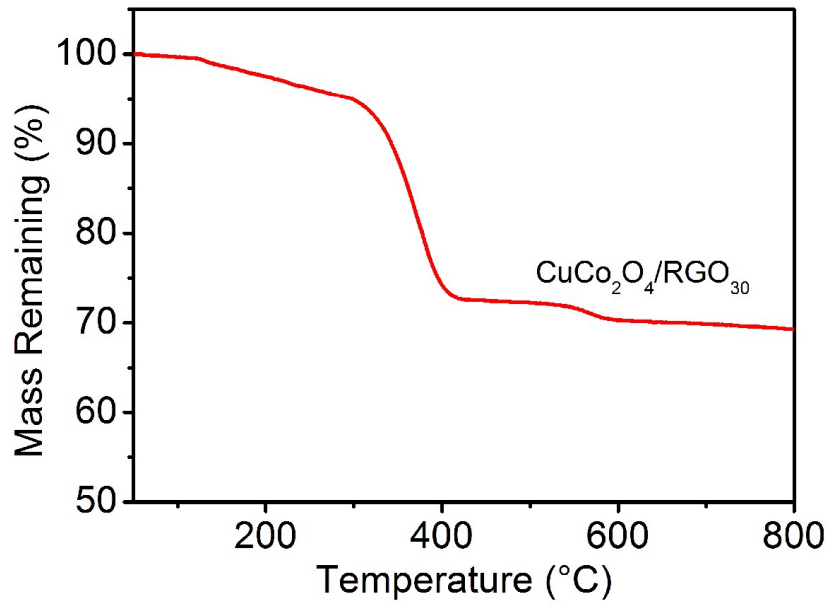

Figure S3 TG curve of the  $\text{CuCo}_2\text{O}_4/\text{RGO}_{30}$  composite

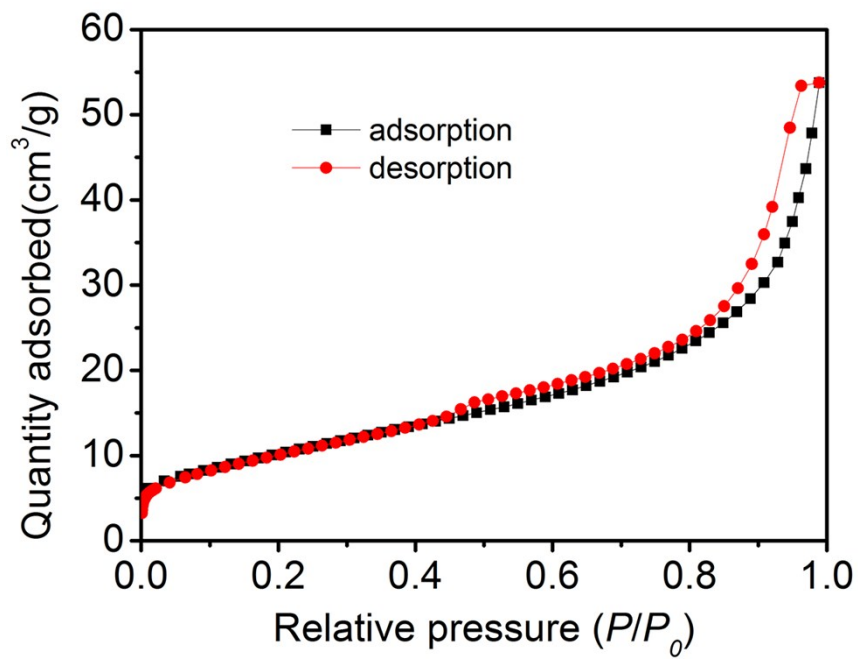

Figure S4  $\text{N}_2$  adsorption-desorption isotherms for pure  $\text{CuCo}_2\text{O}_4$  spinel

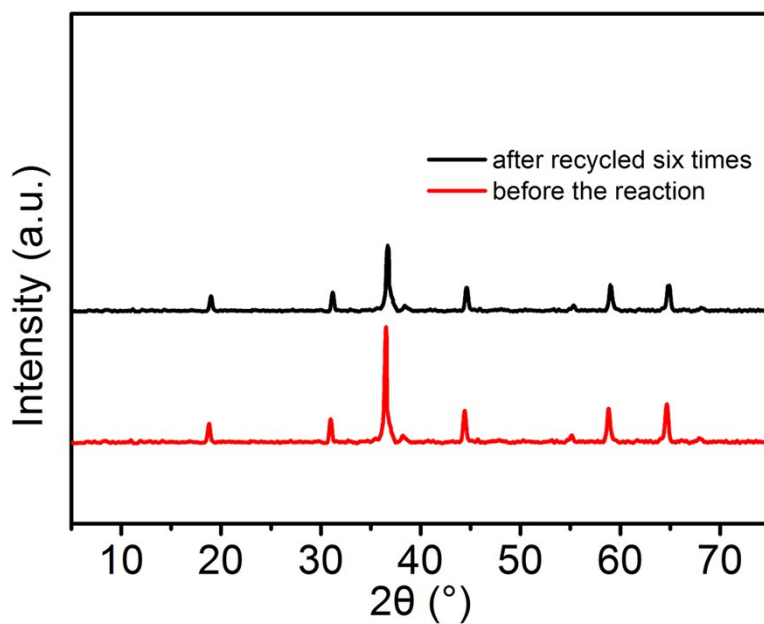

Figure S5 XRD pattern before and after recycled

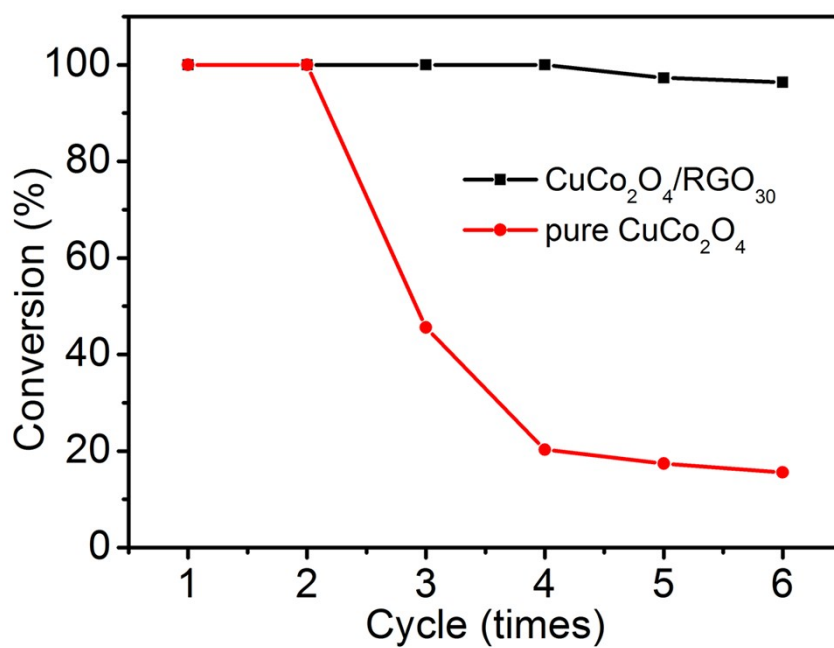

Figure S6 *p*-nitrophenol in six times cycles of reduction
